# Supplementary material for: Measles Virus Ribonucleoprotein Complexes Rapidly Spread across Well-Differentiated Primary Human Airway Epithelial Cells along F-Actin Rings
Source: PubMed Central journal article supplement (PMC6879720; doi:10.1128/mbio.02434-19), 2019-11-26

Figure S5

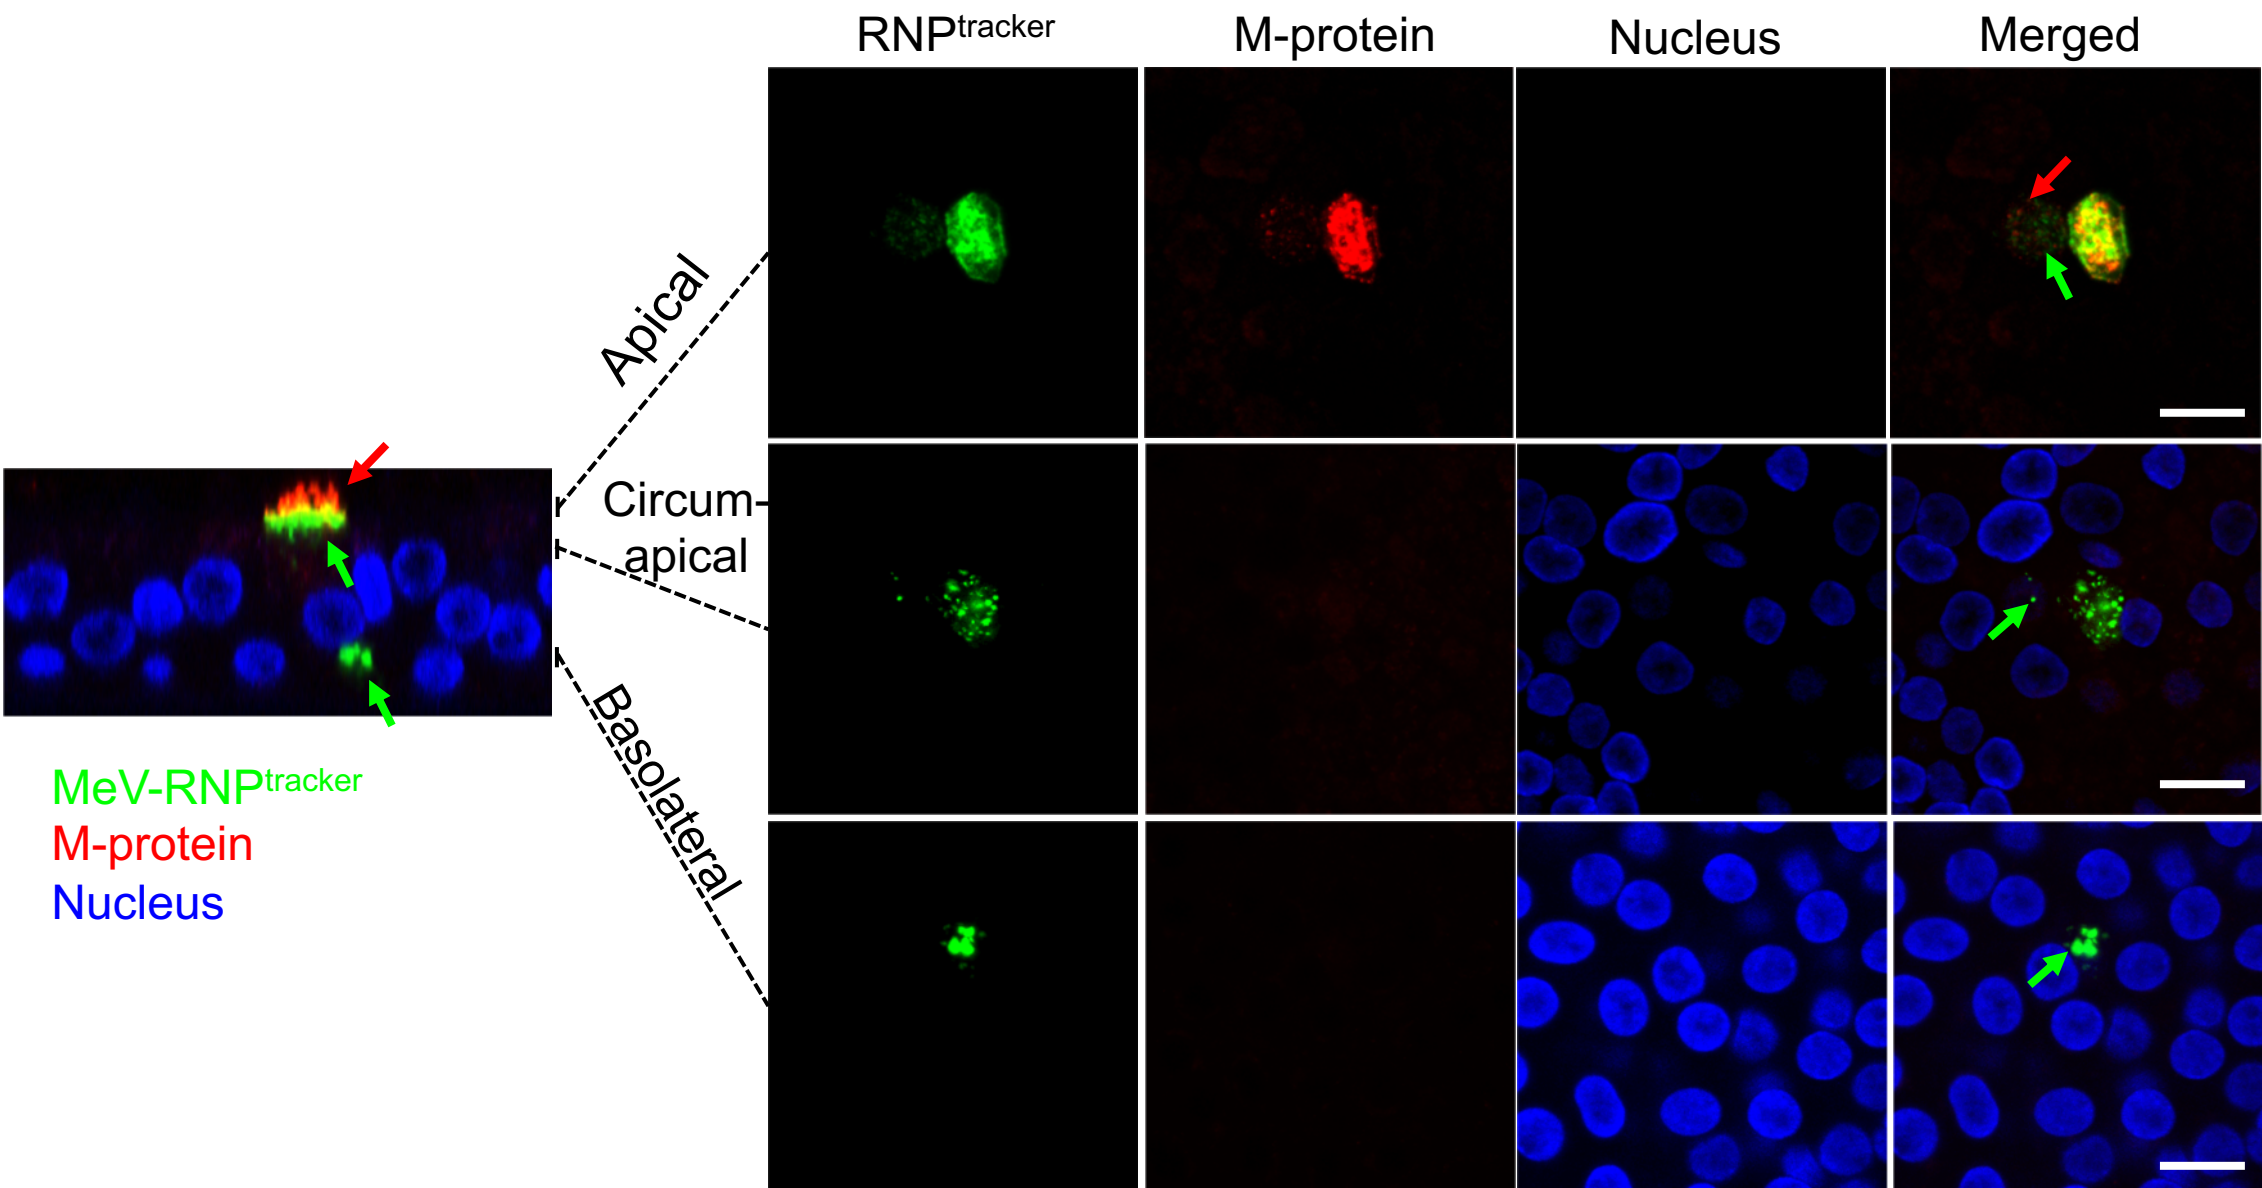

Supplement: mBio.02434-19-sf005.pdf [file mBio.02434-19-sf005.pdf]
